# Supplementary material for: Tunable valley polarization, magnetic anisotropy and Dzyaloshinskii–Moriya interaction in two-dimensional intrinsic ferromagnetic Janus 2H-VSeX (X = S, Te) monolayers
Source: Royal Society of Chemistry journal article supplement (doi:10.1039/d0cp03292a), 2020-01-01
Supplement: d0cp03292a1.pdf [file d0cp03292a1.pdf]

*Electronic Supplementary Information for*

**Tunable Valley Polarization, Magnetic Anisotropy and Dzyaloshinskii-Moriya  
Interaction in Two-Dimensional Intrinsic Ferromagnetic Janus 2H-VSeX (X = S,  
Te) Monolayers**

Shengmei Qi, Jiawei Jiang, Wenbo Mi\*

*Tianjin Key Laboratory of Low Dimensional Materials Physics and Preparation Technology,*

*School of Science, Tianjin University, Tianjin 300354, China*

---

\*Author to whom all correspondence should be addressed.

E-mail: miwenbo@tju.edu.cn

**Table S1** Lattice constant  $a$  (Å), V-Se bond length  $L_{V-Se}$  (Å), V/Se magnetic moment  $M_{V/Se}$  ( $\mu_B$ ), total magnetic moment of unit cell  $M_{total}$  ( $\mu_B$ ), magnetic anisotropic energy MAE (meV), band gap  $E_g$  (eV) and valley splitting  $\Delta V$  (meV) with SOC of the unit cell 2H-VSe<sub>2</sub> monolayer with different  $U_{eff}$  (eV).

| $U_{ef}$ | $a$   | $L_{V-Se}$ | $M_V$ | $M_{Se}$ | $M_{total}$ | MAE   | $E_g$                | $\Delta V$ |
|----------|-------|------------|-------|----------|-------------|-------|----------------------|------------|
| 0        | 3.319 | 2.497      | 1.070 | -0.066   | 0.939       | 0.599 | 0.197 (K→M)          | 78.4       |
| 0.5      | 3.328 | 2.500      | 1.123 | -0.084   | 0.956       | 0.538 | 0.344 (K→M)          | 78.3       |
| 1        | 3.335 | 2.505      | 1.181 | -0.104   | 0.973       | 0.506 | 0.497 (K→M)          | 78.1       |
| 1.5      | 3.342 | 2.509      | 1.244 | -0.126   | 0.993       | 0.545 | 0.649 (K→K)          | 78         |
| 2        | 3.349 | 2.514      | 1.317 | -0.150   | 1.016       | 0.513 | 0.627 ( $\Gamma$ →K) | 77.6       |

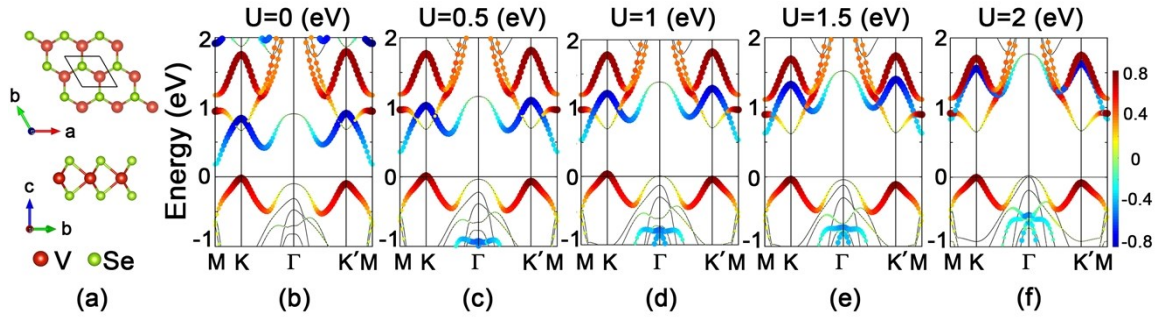

**Fig. S1** (a) Top and side views of 2H-VSe<sub>2</sub> monolayer. (b)-(f) Band structure of 2H-VSe<sub>2</sub> monolayer with SOC and different  $U_{\text{eff}}$  (eV). The circles represent V- $d_{x^2-y^2}$  and V- $d_{xy}$  orbitals. The circle size is proportional to the contribution of the orbital components. The color scale represents the spin projection. Fermi level is set to zero.

**Table S2** Calculated total energy (meV/f.u.) relative to the in-plane FM configuration among all magnetic configurations of Janus 2H-VSeX ( $X = \text{S, Te}$ ) monolayers.

| Magnetic configurations |                   | VSSe    | VSeTe   |
|-------------------------|-------------------|---------|---------|
| FM                      | [001]             | 0.431   | 1.479   |
|                         | [100]             | 0       | 0       |
|                         | [00 $\bar{1}$ ]   | 0.432   | 1.478   |
| stripy-AFM              | out-of-plane      | 95.117  | 103.945 |
|                         | in-plane          | 95.345  | 104.234 |
| zigzag-AFM              | out-of-plane      | 98.823  | 100.876 |
|                         | in-plane          | 99.309  | 101.146 |
| frustrated-spin         | FM out-of-plane   | ...     | ...     |
|                         | AFM1 out-of-plane | 53.195  | 50.1    |
|                         | AFM2 in-plane     | 129.547 | 140.186 |

**Table S3** Lattice constant  $a$  (Å), V-S bond length  $L_{V-S}$  (Å), V-Se bond length  $L_{V-Se}$  (Å), S-V-Se bond angle  $\theta$  (°), V/S/Se magnetic moment  $M_{V/S/Se}$  ( $\mu_B$ ), band gap  $E_g$  (eV), valley splitting  $\Delta V$  (meV) with SOC of Janus VSSe monolayer at in-plane biaxial strain (%).

| Strai | $a$   | $L_{V-S}$ | $L_{V-Se}$ | $\theta$ | Magnetic moment |       |          | $E_g$ | $\Delta V$ |
|-------|-------|-----------|------------|----------|-----------------|-------|----------|-------|------------|
|       |       |           |            |          | $M_S$           | $M_V$ | $M_{Se}$ |       |            |
| -8    | 2.997 | 2.298     | 2.464      | 86.6     | -0.010          | 0.940 | -0.006   | ...   | 66.6       |
| -6    | 3.062 | 2.311     | 2.465      | 84.3     | -0.026          | 1.004 | -0.053   | ...   | 69.3       |
| -4    | 3.127 | 2.327     | 2.477      | 82.3     | -0.038          | 1.050 | -0.077   | 0.222 | 70.1       |
| -2    | 3.192 | 2.345     | 2.492      | 80.5     | -0.049          | 1.087 | -0.095   | 0.324 | 69.7       |
| 0     | 3.257 | 2.363     | 2.508      | 78.7     | -0.058          | 1.120 | -0.110   | 0.322 | 68.6       |
| 2     | 3.322 | 2.383     | 2.526      | 77.0     | -0.067          | 1.153 | -0.124   | 0.303 | 66.9       |
| 4     | 3.387 | 2.404     | 2.546      | 75.4     | -0.077          | 1.187 | -0.138   | 0.096 | 64.6       |
| 6     | 3.453 | 2.424     | 2.567      | 73.7     | -0.089          | 1.228 | -0.152   | ...   | 61.6       |
| 8     | 3.518 | 2.439     | 2.591      | 72.0     | -0.109          | 1.286 | -0.171   | ...   | 56         |

**Table S4** Lattice constant  $a$  (Å), V-Se bond length  $L_{V-Se}$  (Å), V-Te bond length  $L_{V-Te}$  (Å), Te-V-Se bond angle  $\theta$  (°), V/Se/Te magnetic moment  $M_{V/Se/Te}$  ( $\mu_B$ ), band gap  $E_g$  (eV), valley splitting  $\Delta V$  (meV) with SOC of Janus VSeTe monolayer at in-plane biaxial strain (%).

| Strai | $a$   | $L_{V-Se}$ | $L_{V-Te}$ | $\theta$ | Magnetic moment |          |          | $E_g$ | $\Delta V$ |
|-------|-------|------------|------------|----------|-----------------|----------|----------|-------|------------|
|       |       |            |            |          | $M_V$           | $M_{Se}$ | $M_{Te}$ |       |            |
| -8    | 3.186 | 2.453      | 2.698      | 88.4     | 0.962           | -0.043   | 0.015    | ...   | 78.1       |
| -6    | 3.255 | 2.455      | 2.689      | 85.6     | 1.049           | -0.048   | -0.050   | ...   | 83.3       |
| -4    | 3.325 | 2.469      | 2.692      | 83.5     | 1.094           | -0.055   | -0.082   | ...   | 92.6       |
| -2    | 3.394 | 2.486      | 2.704      | 81.5     | 1.139           | -0.065   | -0.105   | 0.057 | 90.6       |
| 0     | 3.463 | 2.505      | 2.720      | 79.7     | 1.183           | -0.075   | -0.123   | 0.232 | 86         |
| 2     | 3.532 | 2.525      | 2.737      | 78.0     | 1.226           | -0.086   | -0.140   | 0.184 | 79.7       |
| 4     | 3.602 | 2.547      | 2.756      | 76.3     | 1.270           | -0.096   | -0.155   | 0.013 | 70.5       |
| 6     | 3.671 | 2.561      | 2.779      | 74.5     | 1.334           | -0.116   | -0.174   | ...   | 52.8       |
| 8     | 3.740 | 2.575      | 2.804      | 72.6     | 1.424           | -0.146   | -0.200   | ...   | 0.8        |

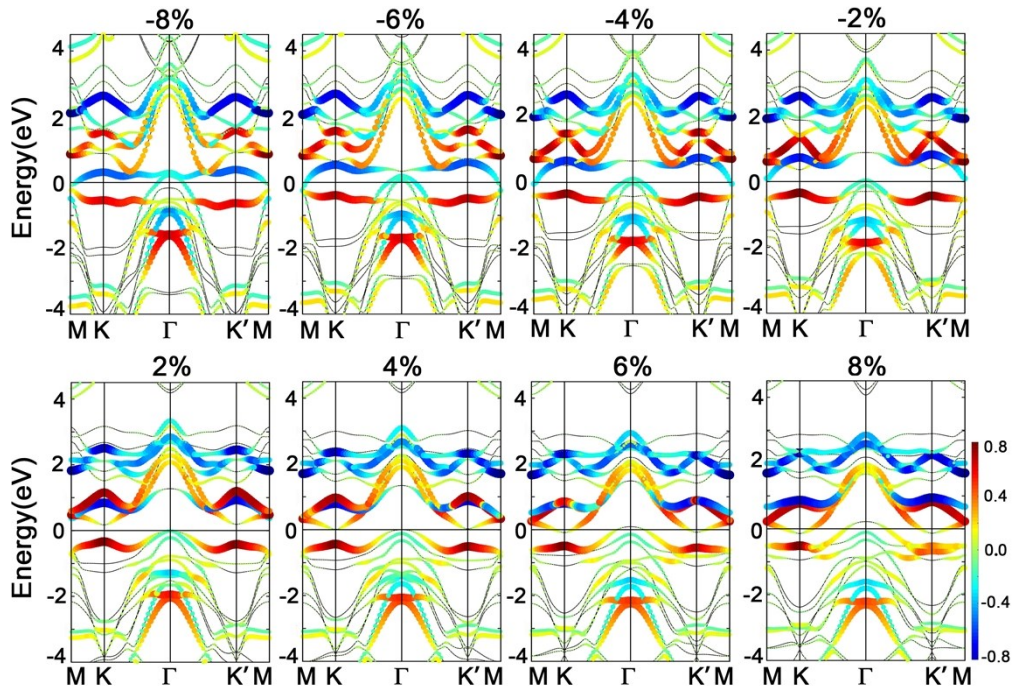

**Fig. S2** Band structure of Janus VSeTe monolayer with SOC and M//z at different biaxial strains from -8% to 8%. The circles represent  $V-d_{x^2-y^2}$  and  $V-d_{xy}$  orbitals. The circle size is proportional to the contribution of the orbital components. The color scale represents the spin projection. Fermi level is set to zero.

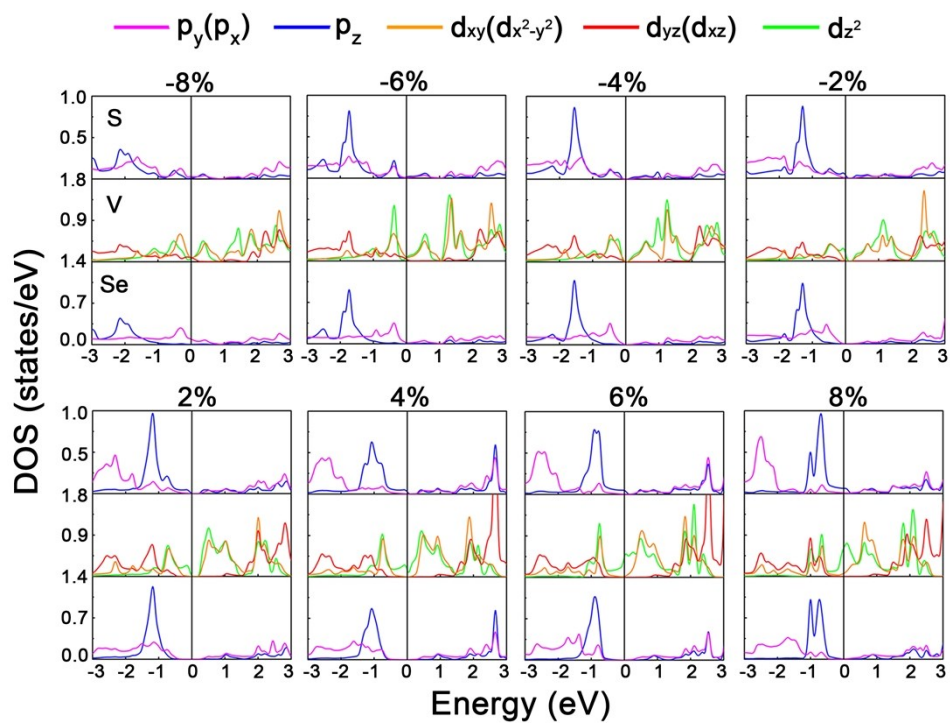

**Fig. S3** Orbital-resolved DOS with SOC of Janus VSSe monolayer at different biaxial strains from -8% to 8%.



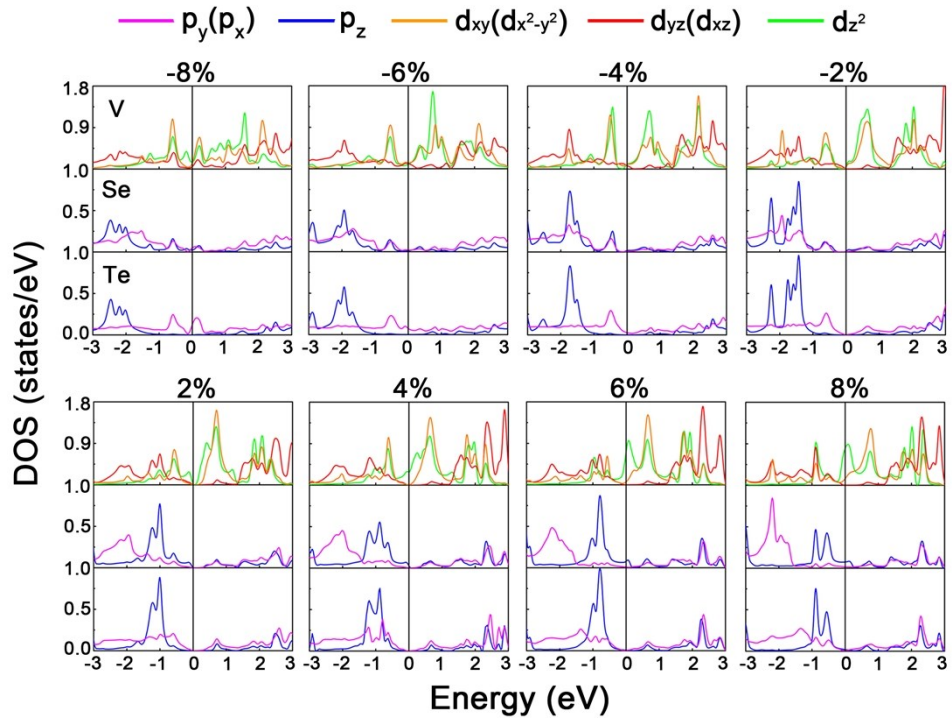

**Fig. S4** Orbital-resolved DOS with SOC of Janus VSeTe monolayer at different biaxial strains from -8% to 8%.
